# Supplementary material for: Cytarabine-Resistant FLT3-ITD Leukemia Cells are Associated with TP53 Mutation and Multiple Pathway Alterations—Possible Therapeutic Efficacy of Cabozantinib
Source: PubMed Central journal article supplement (PMC6429333; doi:10.3390/ijms20051230), 2019-03-11
Supplement: ijms-20-01230-s001.pdf [file ijms-20-01230-s001.pdf]

## Supplementary

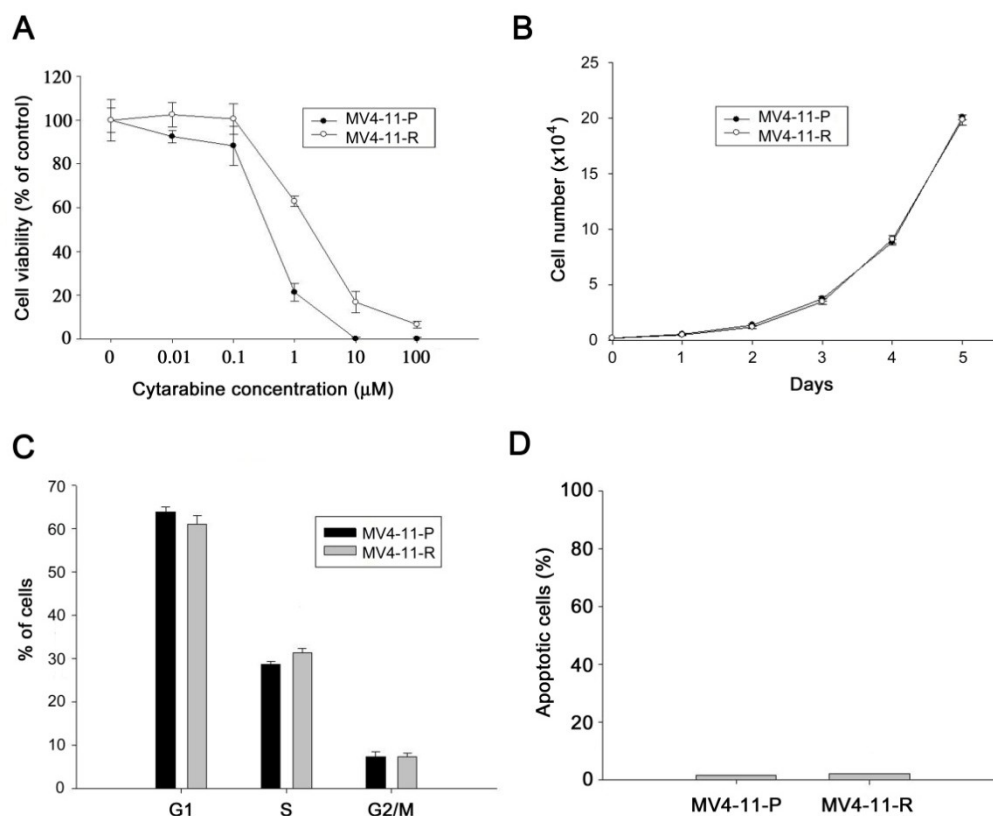

**Figure S1.** Cytotoxicity of cytarabine (A), growth curves (B), distribution of cell cycle phases (C), and apoptotic ratios (D) were assessed in MV4-11-P and MV4-11-R. For growth curves, cells were seeded on 6-well plates at 2500 cells/well. Viable cell numbers were counted after 24, 48, 72, 96, and 120 h by trypan blue exclusion method. For cell cycle and apoptosis analyses, cells were seeded on 6-well plates at  $2.5 \times 10^5$  cells/well. After 24 h, cells were fixed, treated with RNase A, and stained with  $5 \mu\text{g/ml}$  of propidium iodide for 10 min. Cell cycle distribution was analyzed using a Coulter EPICS XL-MCL flow cytometer (Beckman Coulter, Inc., Brea, CA, USA) with EXPO32 and MultiCycle software. Cells in the sub-G1 fraction was considered apoptotic cells.

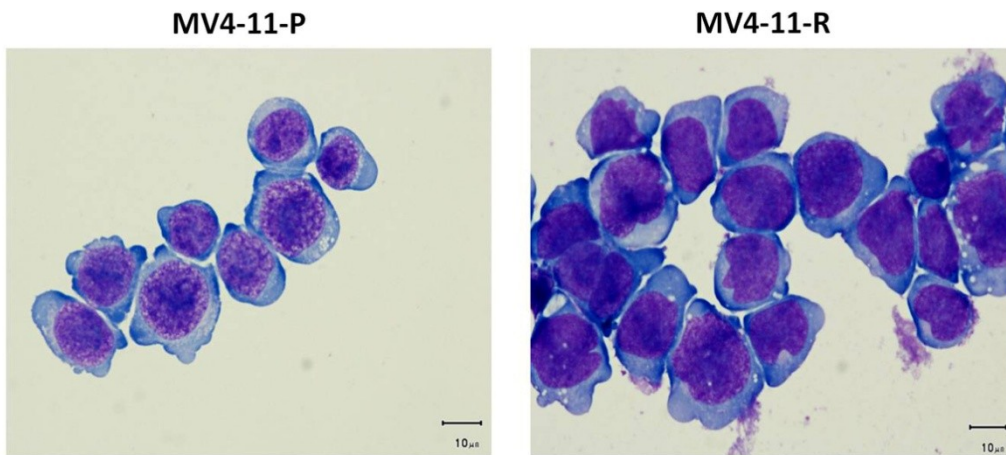

**Figure S2.** Morphological features of MV4-11-P and MV4-11-R were observed using Liu's staining. Scale bars = 10  $\mu$ M.

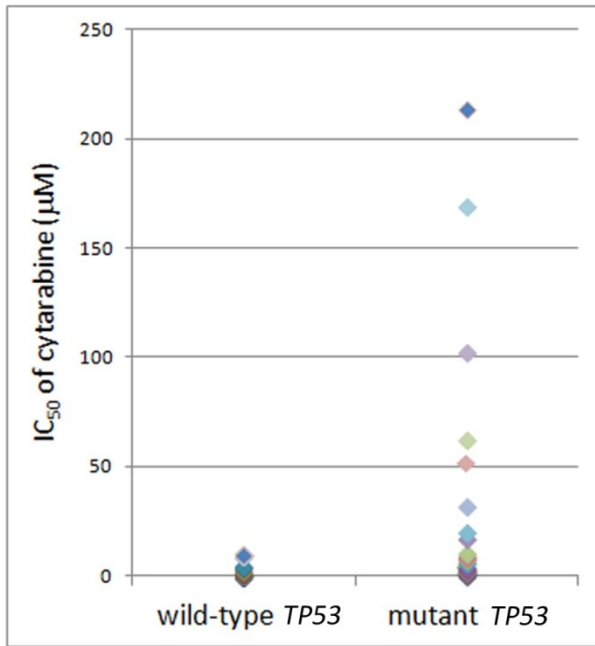

|                       | No. of cell lines | average | SD    |
|-----------------------|-------------------|---------|-------|
| wild-type <i>TP53</i> | 12                | 1.91    | 2.82  |
| mutant <i>TP53</i>    | 36                | 21.07   | 44.03 |

**Figure S3.** Comparison of  $IC_{50}$  values of cytarabine between cancer cell lines harboring wild-type and mutant *TP53*. The NCI-60 cell lines with  $IC_{50}$  values of cytarabine available from the online database CancerDR (<http://crdd.osdd.net/raghava/cancerdr/index.html>) were included for comparison. (SD: standard deviation;  $p = 0.0077$ )

**Table S1.** Expression levels of cell surface markers in MV4-11-P and MV4-11-R.

| Marker | MV4-11-P     | MV4-11-R     |
|--------|--------------|--------------|
|        | Percentage   | Percentage   |
| CD 45  | 98.4%        | 96.7%        |
| CD 1b  | 0.2% - 0.7%  | 0.1% - 0.7%  |
| CD 32  | 0.1% - 0.5%  | 0.1% - 0.6%  |
| CD 34  | 0.6% - 11.9% | 0.3% - 18.6% |
| CD 117 | 0.6% - 1.8%  | 0.1% - 2.6%  |
| HLA-DR | 12.7%        | 2.4%         |
| CD 3   | 0.3%         | 0.3%         |
| CD 20  | 0.1%         | 0.3%         |
| CD 19  | 0.2%         | 0.2%         |
| CD 5   | 0.1%         | 0.3%         |
| CD 7   | 0.1%         | 0.2%         |
| CD 33  | 0.1%         | 0.2%         |
| CD 11b | 0.1%         | 0.4%         |
| CD 56  | 22.8%        | 37.2%        |
| CD 38  | 0.4%         | 0.8%         |
| GPA    | 0.2%         | 0.1%         |
| CD 41  | 0.2%         | 0.3%         |
| CD 14  | 0.4%         | 0.2%         |
| CD 2   | 0.5%         | 0.4%         |
| CD 13  | 2.3%         | 1.3%         |
| CD 16  | 5.7%         | 8.8%         |
| IgM    | 0.6%         | 0.4%         |
| CD 15  | 100.0%       | 100.0%       |

**Table S2.** List of NCI-60 cell lines, p53 mutant protein variants, pathogenicity of p53 mutants, and cytarabine IC<sub>50</sub> data.

| Cell line            | Cancer               | p53_variant <sup>a</sup> | Pathogenicity <sup>b</sup>        | Cytarabine IC <sub>50</sub> (μM) <sup>c</sup> |
|----------------------|----------------------|--------------------------|-----------------------------------|-----------------------------------------------|
| MOLT-4               | Leukemia/lymphoma    | p.R306*                  | Pathogenic                        | 0.09                                          |
| OVCAR-8              | Ovarian carcinoma    | p.0?                     | -                                 | 0.21                                          |
| SW620 <sup>d</sup>   | Colorectal carcinoma | p.P309S<br>p.R273H       | Possibly pathogenic<br>Pathogenic | 0.35                                          |
| HOP-92               | Lung (NSCLC)         | p.R175L                  | Possibly pathogenic               | 0.36                                          |
| BT-549               | Breast carcinoma     | p.R249S                  | Pathogenic                        | 0.53                                          |
| SN12C                | Renal cell carcinoma | p.E336*                  | Pathogenic                        | 0.62                                          |
| 786-0 <sup>d</sup>   | Renal cell carcinoma | p.0?<br>p.P278A          | -<br>Likely pathogenic            | 0.67                                          |
| RXF393               | Renal cell carcinoma | p.R175H                  | Pathogenic                        | 0.70                                          |
| SF-539               | Glioblastoma         | p.R342fs*3               | Likely pathogenic                 | 0.72                                          |
| SK-MEL-28            | Melanoma             | p.L145R                  | Likely pathogenic                 | 0.80                                          |
| Hs-578-T             | Breast carcinoma     | p.V157F                  | Pathogenic                        | 0.84                                          |
| U251                 | Glioblastoma         | p.R273H                  | Pathogenic                        | 1.13                                          |
| NCI-H23              | Lung (NSCLC)         | p.M246I                  | Possibly pathogenic               | 1.20                                          |
| SF-268               | Glioblastoma         | p.R273H                  | Pathogenic                        | 1.36                                          |
| TK10                 | Renal cell carcinoma | p.L264R                  | Possibly pathogenic               | 1.73                                          |
| IGROV-1 <sup>d</sup> | Ovarian carcinoma    | p.P90fs*59<br>p.Y126C    | Likely pathogenic<br>Pathogenic   | 1.79                                          |
| HL-60                | Leukemia/lymphoma    | p.0                      | -                                 | 2.44                                          |
| NCI-H226             | Lung (NSCLC)         | p.R158L                  | Pathogenic                        | 2.51                                          |
| HCC-2998             | Colorectal carcinoma | p.R213*                  | Pathogenic                        | 2.57                                          |
| HT-29                | Colorectal carcinoma | p.R273H                  | Pathogenic                        | 3.51                                          |
| SK-MEL-2             | Melanoma             | p.G245S                  | Pathogenic                        | 4.01                                          |
| SF-295               | Glioblastoma         | p.R248Q                  | Pathogenic                        | 4.02                                          |
| OVCAR-4              | Ovarian carcinoma    | p.L130V                  | Likely pathogenic                 | 6.04                                          |
| HCT-15               | Colorectal carcinoma | p.0?<br>p.S241F          | -<br>Pathogenic                   | 8.07                                          |
| MDA-MB-231           | Breast carcinoma     | p.R280K                  | Pathogenic                        | 8.77                                          |

|                   |                      |                       |                                   |        |
|-------------------|----------------------|-----------------------|-----------------------------------|--------|
| SNB-75            | Glioblastoma         | p.E258K               | Pathogenic                        | 9.30   |
| KM12 <sup>e</sup> | Colorectal carcinoma | p.H179R<br>p.V73fs*50 | Pathogenic<br>-                   | 10.21  |
| HOP-62            | Lung (NSCLC)         | p.0?                  | -                                 | 16.46  |
| OVCAR-3           | Ovarian carcinoma    | p.R248Q               | Pathogenic                        | 20.13  |
| CCRF-CEM          | Leukemia/lymphoma    | p.R175H<br>p.R248Q    | Pathogenic<br>Pathogenic          | 31.78  |
| T47D              | Breast carcinoma     | p.L194F               | Likely pathogenic                 | 31.85  |
| DU-145            | Prostate carcinoma   | p.P223L<br>p.V274F    | Possibly Pathogenic<br>Pathogenic | 51.50  |
| RPMI-8226         | Leukemia/lymphoma    | p.E285K               | Pathogenic                        | 61.72  |
| K-562             | Leukemia/lymphoma    | p.Q136fs*13           | Likely pathogenic                 | 102.03 |
| SK-OV-3           | Ovarian carcinoma    | p.P90fs*33            | Likely pathogenic                 | 169.00 |
| EKVX              | Lung (NSCLC)         | p.E204*               | Likely pathogenic                 | 213.55 |
| A-549             | Lung (NSCLC)         | Wild type             | -                                 | 0.05   |
| CAKI-1            | Renal cell carcinoma | Wild type             | -                                 | 0.12   |
| OVCAR-5           | Ovarian carcinoma    | Wild type             | -                                 | 0.22   |
| HCT-116           | Colorectal carcinoma | Wild type             | -                                 | 0.25   |
| LOXIMVI           | Melanoma             | Wild type             | -                                 | 0.29   |
| ACHN              | Renal cell carcinoma | Wild type             | -                                 | 0.37   |
| UACC-62           | Melanoma             | Wild type             | -                                 | 0.67   |
| UO-31             | Renal cell carcinoma | Wild type             | -                                 | 1.25   |
| MCF-7             | Breast carcinoma     | Wild type             | -                                 | 2.00   |
| A498              | Renal cell carcinoma | Wild type             | -                                 | 3.71   |
| UACC-257          | Melanoma             | Wild type             | -                                 | 4.44   |
| NCI-H460          | Lung (NSCLC)         | Wild type             | -                                 | 9.57   |

<sup>a</sup>Leroy, B.; Girard, L.; Hollestelle, A.; Minna, J. D.; Gazdar, A. F.; Soussi, T., Analysis of TP53 mutation status in human cancer cell lines: a reassessment. *Human mutation* 2014, 35, (6), 756-65.

<sup>b</sup>The TP53 Web Site. Available online: <https://p53.fr/> (accessed on 2018/12/22).

<sup>c</sup>CancerDR: Cancer Drug Resistance Database. Available online: <http://crdd.osdd.net/raghava/cancerdr/> (accessed on 2018/12/22).

<sup>d</sup>Cell line with two *TP53* mutations.

<sup>e</sup>Cell line with three *TP53* mutations.

**Table S3.** Association of *TP53* mutation with resistance to anti-cancer drugs assessed by data of pancancer cell lines from Genomics of Drug Sensitivity in Cancer. Available online: <https://www.cancerrxgene.org/>.

| Drug         | Drug target                                       | Effect size | P-value | FDR% | No. of screened cell lines | No. of <i>TP53</i> mutated cell lines |
|--------------|---------------------------------------------------|-------------|---------|------|----------------------------|---------------------------------------|
| cytarabine   | antimetabolite                                    | 0.284       | 0.0321  | 73.9 | 876                        | 552                                   |
| CI-1040      | MEK1, MEK2                                        | 0.255       | 0.00882 | 20.3 | 869                        | 549                                   |
| cabozantinib | VEGFR, MET, RET, KIT, FLT1, FLT3, FLT4, TIE2, AXL | 0.117       | 0.618   | 79.7 | 975                        | 607                                   |
| sorafenib    | PDGFR, KIT, VEGFR, RAF                            | 0.131       | 0.819   | 87.7 | 430                        | 249                                   |
| MK-2206      | AKT1, AKT2                                        | -0.0641     | 0.0606  | 97.6 | 852                        | 536                                   |
